# Supplementary material for: Evaluation of WRF-Chem simulated meteorology and aerosols over northern India during the severe pollution episode of 2016
Source: Copernicus journal article supplement (doi:10.5194/egusphere-2023-1150), 2023-08-07
Supplement: Supplementary file 1 [file egusphere-2023-1150-supplement.pdf]

## Supplementary Material

### Evaluation of WRF-Chem simulated meteorology and aerosols over northern India during the severe pollution episode of 2016

Prerita Agarwal<sup>1</sup>, David S. Stevenson<sup>1</sup>, Mathew R Heal<sup>2</sup>

<sup>1</sup>School of GeoSciences, University of Edinburgh, Crew Building, Edinburgh, EH9 3FF, UK,

<sup>2</sup>School of Chemistry, University of Edinburgh, Joseph Black Building, Edinburgh, EH9 3FJ, UK

Correspondence to: Prerita Agarwal ([prerita.agarwal@ed.ac.uk](mailto:prerita.agarwal@ed.ac.uk)), David Stevenson ([david.s.stevenson@ed.ac.uk](mailto:david.s.stevenson@ed.ac.uk))

**Table S1.** WRF-Chem model set-up and selected parametrization schemes.

| WRF-Chem Configuration      | Description                                             |
|-----------------------------|---------------------------------------------------------|
| Microphysics                | Morrison double-moment scheme                           |
| Longwave radiation          | Rapid Radiative Transfer Model (RRTM) longwave scheme   |
| Shortwave radiation         | RRTMG shortwave scheme                                  |
| Boundary-layer physics      | Mellor–Yamada Nakanishi and Niino 2.5 level (MYNN2)     |
| Convective parameterisation | Grell 3D ensemble scheme                                |
| Land-surface interactions   | Unified Noah land-surface model with urban canopy model |
| Surface layer               | MYNN surface layer                                      |

**Table S2.** Details of open-access observation datasets used in this study for model evaluation.

| Dataset / Network                                                                         | Access link<br>(Last access: 30 December 2022)                                                                                                                  |
|-------------------------------------------------------------------------------------------|-----------------------------------------------------------------------------------------------------------------------------------------------------------------|
| IEM-ASOS Network,<br>Iowa Environmental Mesonet- Automated<br>Surface Observing System    | <a href="https://mesonet.agron.iastate.edu/request/download.phtml?network=IN_ASOS">https://mesonet.agron.iastate.edu/request/download.phtml?network=IN_ASOS</a> |
| RAOB, Radiosonde observations<br>University of Wyoming database                           | <a href="http://weather.uwyo.edu/upperair/sounding.html">http://weather.uwyo.edu/upperair/sounding.html</a>                                                     |
| MERRA-2,<br>Modern-Era Retrospective analysis for<br>Research and Applications, Version 2 | <a href="https://gmao.gsfc.nasa.gov/reanalysis/MERRA-2/">https://gmao.gsfc.nasa.gov/reanalysis/MERRA-2/</a>                                                     |
| MODIS,<br>Moderate Resolution Imaging<br>Spectroradiometer                                | <a href="https://ladsweb.modaps.eosdis.nasa.gov/search">https://ladsweb.modaps.eosdis.nasa.gov/search</a>                                                       |
| AERONET,<br>AErosol RObotic NETwork                                                       | <a href="https://aeronet.gsfc.nasa.gov/">https://aeronet.gsfc.nasa.gov/</a>                                                                                     |
| CPCB,<br>Central Pollution Control Board                                                  | <a href="https://openaq.org/">https://openaq.org/</a>                                                                                                           |

**Table S3:** The statistical metrics used for model-observation comparison in this study

|                                           |                                                                                                                                |
|-------------------------------------------|--------------------------------------------------------------------------------------------------------------------------------|
| Mean Bias (MB)                            | $\frac{1}{n} \sum_1^n (M - O)$                                                                                                 |
| Normalized mean bias (NMB)                | $\frac{\sum_1^n (M - O)}{\sum_1^n (O)}$                                                                                        |
| Mean absolute error (MAE)                 | $\frac{1}{N} \sum_{i=1}^N  M_i - O_i $                                                                                         |
| Root mean square error (RMSE)             | $\sqrt{\frac{\sum_1^n (M - O)^2}{n}}$                                                                                          |
| Pearson's Correlation coefficient ( $r$ ) | $r = \frac{\sum_{i=0}^N (M_i - \bar{M})(O_i - \bar{O})}{\sqrt{\sum_{i=1}^N (M_i - \bar{M})^2 \sum_{i=0}^N (O_i - \bar{O})^2}}$ |

| Site Name   | Longitude | Latitude | Elevation / m |
|-------------|-----------|----------|---------------|
| Ahmedabad   | 72.63     | 23.08    | 55.0          |
| Baroda      | 73.27     | 22.33    | 44.7          |
| Bhopal      | 77.34     | 23.29    | 522.7         |
| Bhaunagar   | 72.19     | 21.75    | 11.3          |
| Indore      | 75.80     | 22.72    | 563.1         |
| Jabalpur    | 79.95     | 23.20    | 402.2         |
| Nagpur      | 79.05     | 21.09    | 310.0         |
| Porbandar   | 69.66     | 21.65    | 7.0           |
| Rajkot      | 70.78     | 22.31    | 136.9         |
| Udaipur     | 73.90     | 24.62    | 508.4         |
| Agartala    | 91.24     | 23.89    | 16.0          |
| Baghdogra   | 88.32     | 26.63    | 126.0         |
| Shillong    | 91.98     | 25.70    | 892.2         |
| Bhubaneswar | 85.82     | 20.24    | 46.0          |
| Guwahati    | 91.59     | 26.11    | 54.0          |
| Gaya        | 84.95     | 24.74    | 116.0         |
| Imphal      | 93.90     | 24.76    | 781.0         |
| Jamshedpur  | 86.17     | 22.81    | 151.7         |
| Aizwal      | 92.62     | 23.84    | 427.6         |
| Lilabari    | 94.10     | 27.30    | 101.0         |
| Dimapur     | 93.77     | 25.88    | 147.3         |
| Ranchi      | 85.32     | 23.31    | 652.0         |
| Raipur      | 81.74     | 21.18    | 316.0         |
| Kulu        | 77.17     | 31.83    | 1080.7        |
| Dehra Dun   | 78.18     | 30.19    | 547.9         |
| Kangra      | 76.26     | 32.17    | 762.2         |
| Gwalior     | 78.25     | 26.23    | 207.0         |
| Jodhpur     | 73.02     | 26.30    | 294.2         |
| Jaipur      | 75.81     | 26.82    | 390.0         |
| Jammu       | 74.84     | 32.69    | 288.4         |
| Kota        | 75.85     | 25.16    | 285.7         |
| Leh         | 77.55     | 34.14    | 3257.8        |
| Shimla      | 77.07     | 31.08    | 1535.5        |
| Srinagar    | 74.77     | 33.99    | 1666.0        |
| Delhi       | 77.1      | 28.6     | 233.0         |
| Ludhiana    | 76.0      | 30.9     | 255.7         |
| Lucknow     | 80.9      | 26.8     | 128.0         |
| Varanasi    | 82.9      | 25.5     | 83.0          |
| Kolkata     | 88.4      | 22.7     | 6.0           |
| Cooch-behar | 89.5      | 26.3     | 46.6          |
| Gorakhpur   | 83.4      | 26.8     | 77.0          |
| Patna       | 85.1      | 25.6     | 60.0          |
| Agra        | 78.0      | 27.2     | 169.0         |
| Amritsar    | 74.9      | 31.6     | 234.0         |
| Chandigarh  | 76.8      | 30.7     | 316.4         |
| Delhi       | 77.2      | 28.6     | 215.2         |

**Table S4.** Locations and elevations of the ASOS measurement sites used for meteorology evaluation.

**Table S5.** Locations of the CPCB measurement sites used for PM<sub>2.5</sub> evaluation.

|    | <b>City</b> | <b>Location</b>                          | <b>Latitude</b> | <b>Longitude</b> |
|----|-------------|------------------------------------------|-----------------|------------------|
| 1  | Agra        | Sanjay Palace                            | 27.20           | 78.01            |
| 2  | Delhi       | Delhi Technological University           | 28.74           | 77.12            |
| 3  | Delhi       | Income Tax Office                        | 28.62           | 77.25            |
| 4  | Delhi       | R K Puram                                | 28.56           | 77.17            |
| 5  | Delhi       | Anand Vihar                              | 28.65           | 77.32            |
| 6  | Delhi       | Mandir Marg                              | 28.63           | 77.20            |
| 7  | Delhi       | US Diplomatic Post: New Delhi            | 28.64           | 77.22            |
| 8  | Delhi       | Punjabi Bagh                             | 28.67           | 77.12            |
| 9  | Gaya        | Collectorate - Gaya - BSPCB              | 24.75           | 84.94            |
| 10 | Gurgaon     | Vikas Sadan Gurgaon - HSPCB              | 28.45           | 77.03            |
| 11 | Jaipur      | VK Industrial Area Jaipur - RSPCB        | 26.97           | 75.77            |
| 12 | Jodhpur     | Collectorate Jodhpur - RSPCB             | 26.29           | 73.04            |
| 13 | Kanpur      | Nehru Nagar                              | 26.47           | 80.33            |
| 14 | Kolkata     | US Diplomatic Post: Kolkata              | 22.55           | 88.35            |
| 15 | Lucknow     | Central School                           | 26.85           | 81.00            |
| 16 | Muzaffarpur | Collectorate - Muzaffarpur - BSPCB       | 26.08           | 85.41            |
| 17 | Panchkula   | Sector 6 Panchkula - HSPCB               | 30.71           | 76.85            |
| 18 | Patna       | IGSC Planetarium Complex - Patna - BSPCB | 25.36           | 85.08            |
| 19 | Rohtak      | MD University, Rohtak - HSPCB            | 28.88           | 76.62            |
| 20 | Varanasi    | Ardhali Bazar                            | 25.35           | 82.98            |

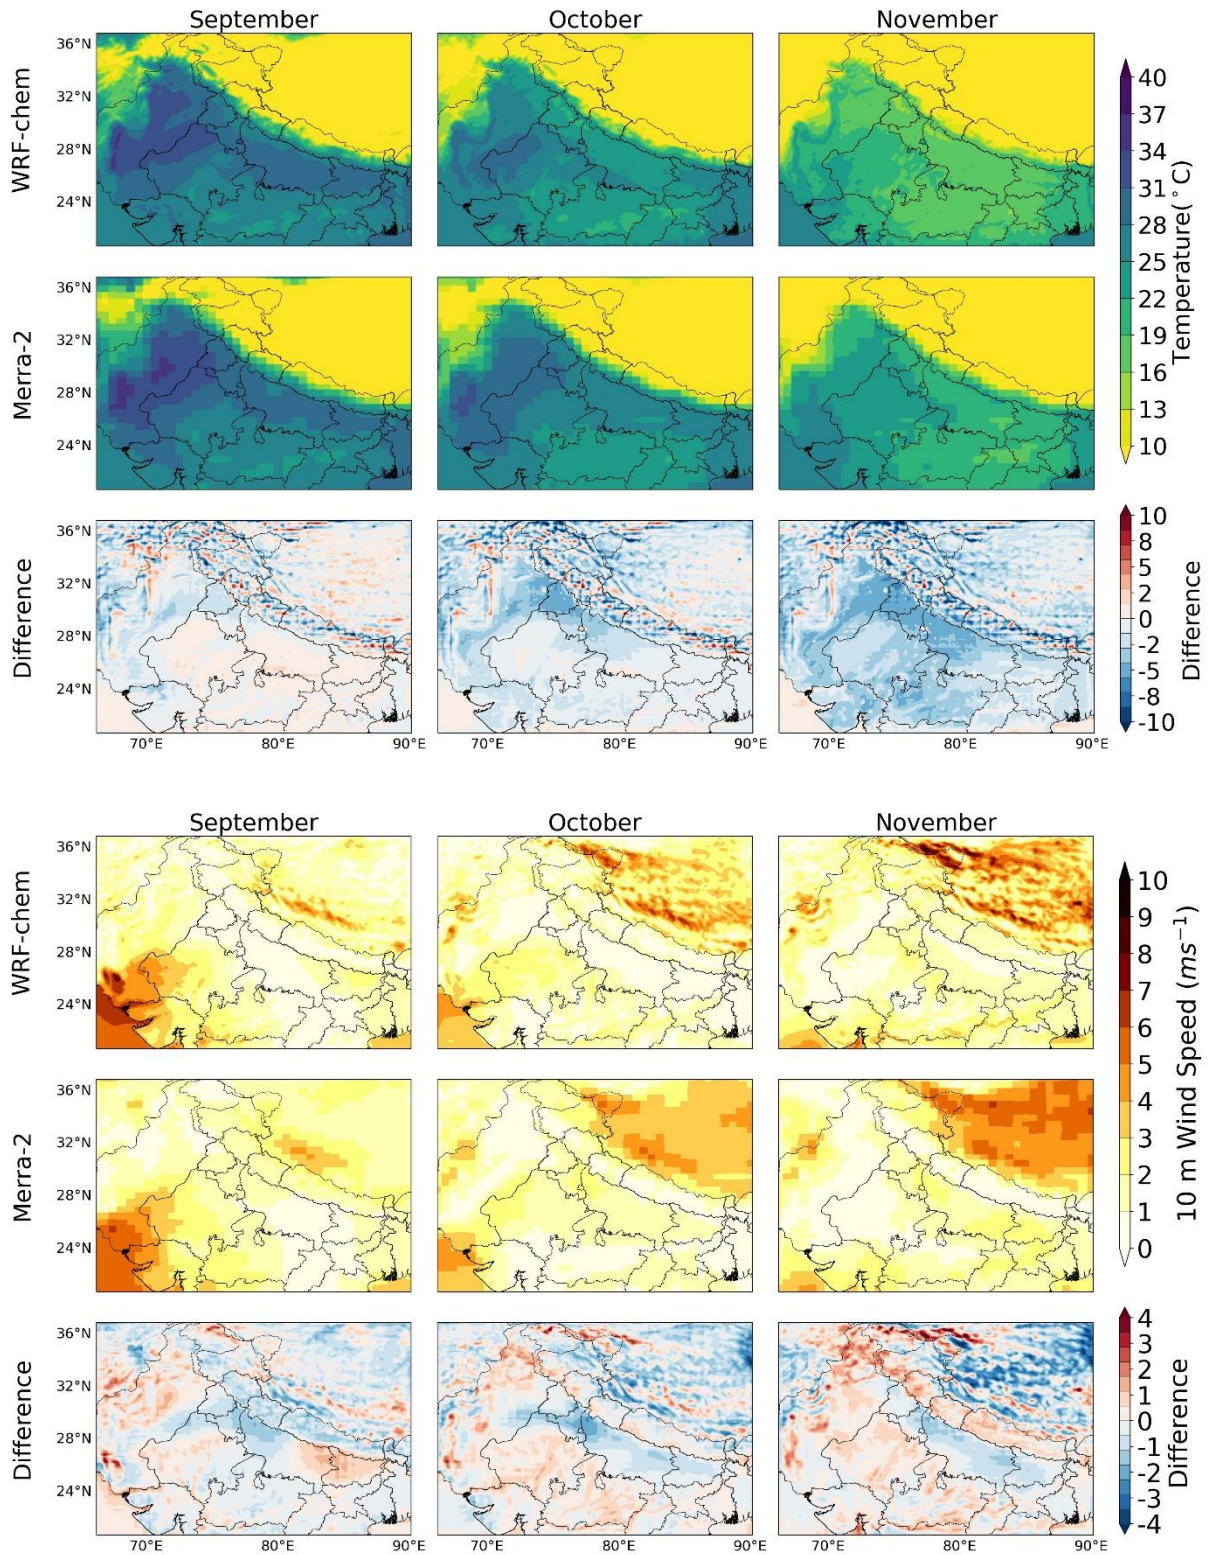

**Figure S1.** Comparisons of spatial distribution of monthly mean a) 2-m temperature and b) 10-m wind speed between WRF-Chem and MERRA-2 data for September to November 2016. The bottom row in a) and b) show the WRF-Chem minus MERRA-2 absolute differences.



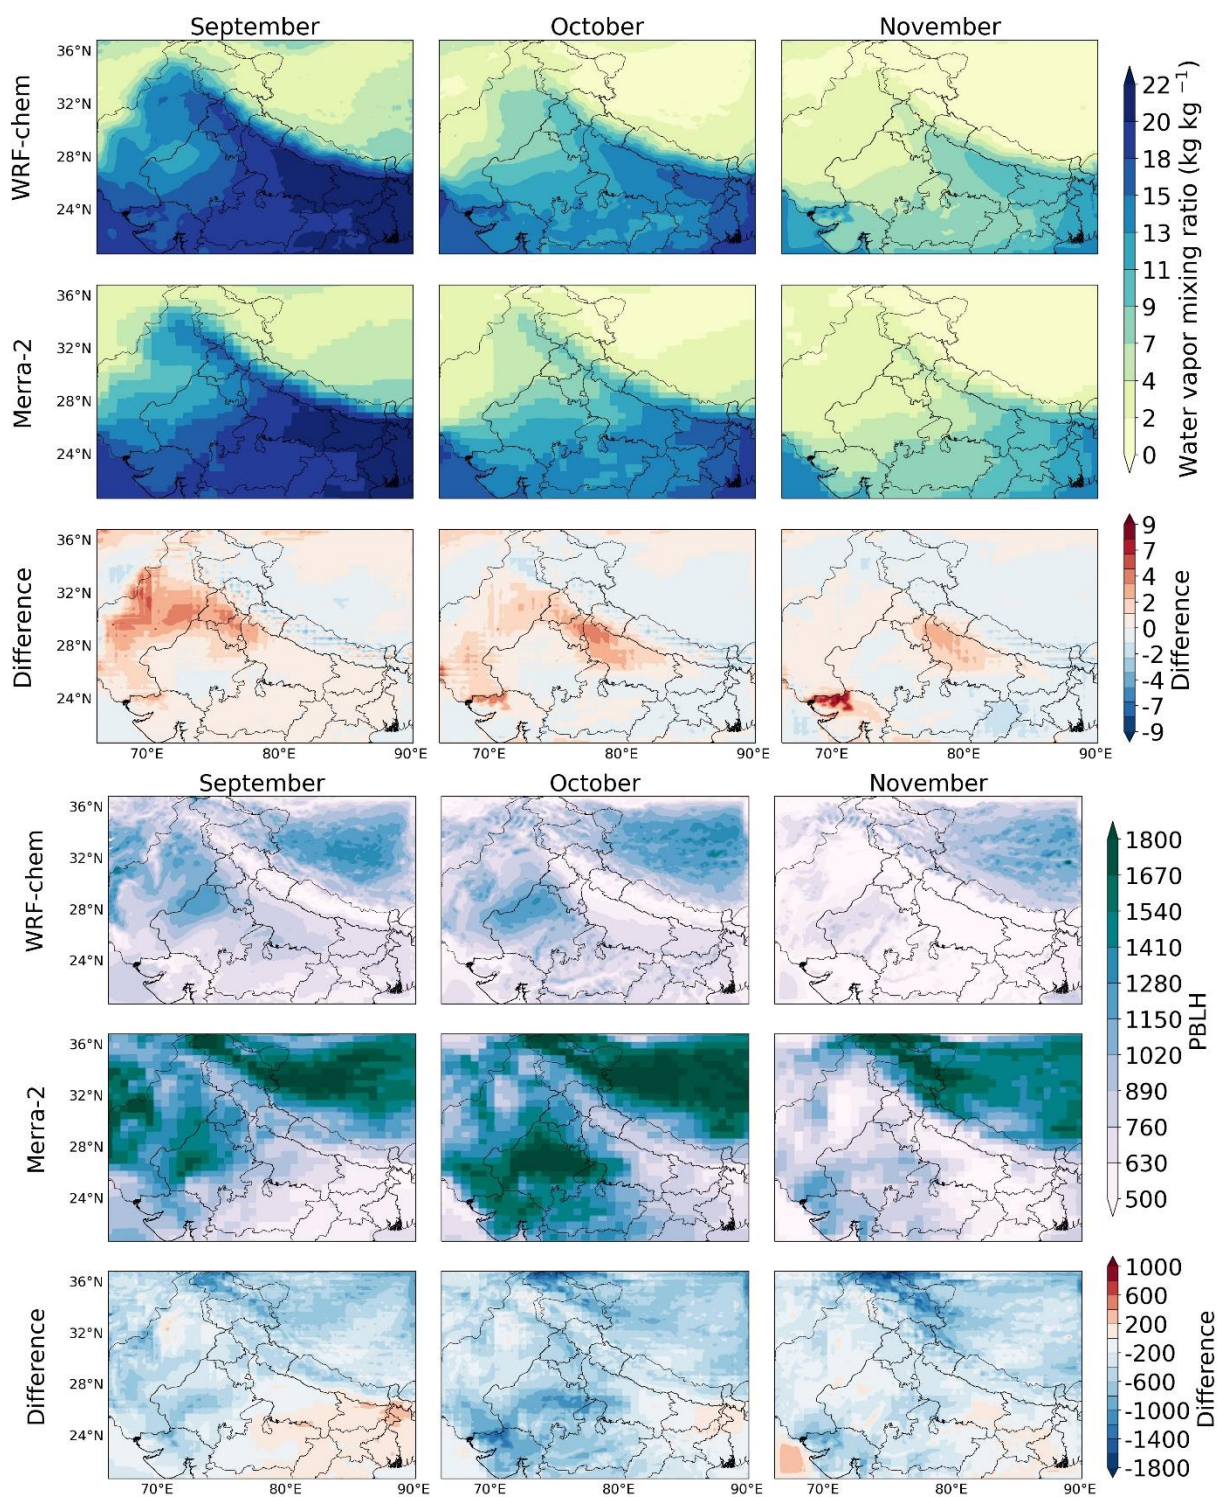

**Figure S2.** Comparisons of spatial distribution of monthly mean a) surface water vapor mixing ratio and b) PBLH between WRF-Chem and MERRA-2 data for September to November 2016. The bottom row in a) and b) show the WRF-Chem minus MERRA-2 absolute differences.



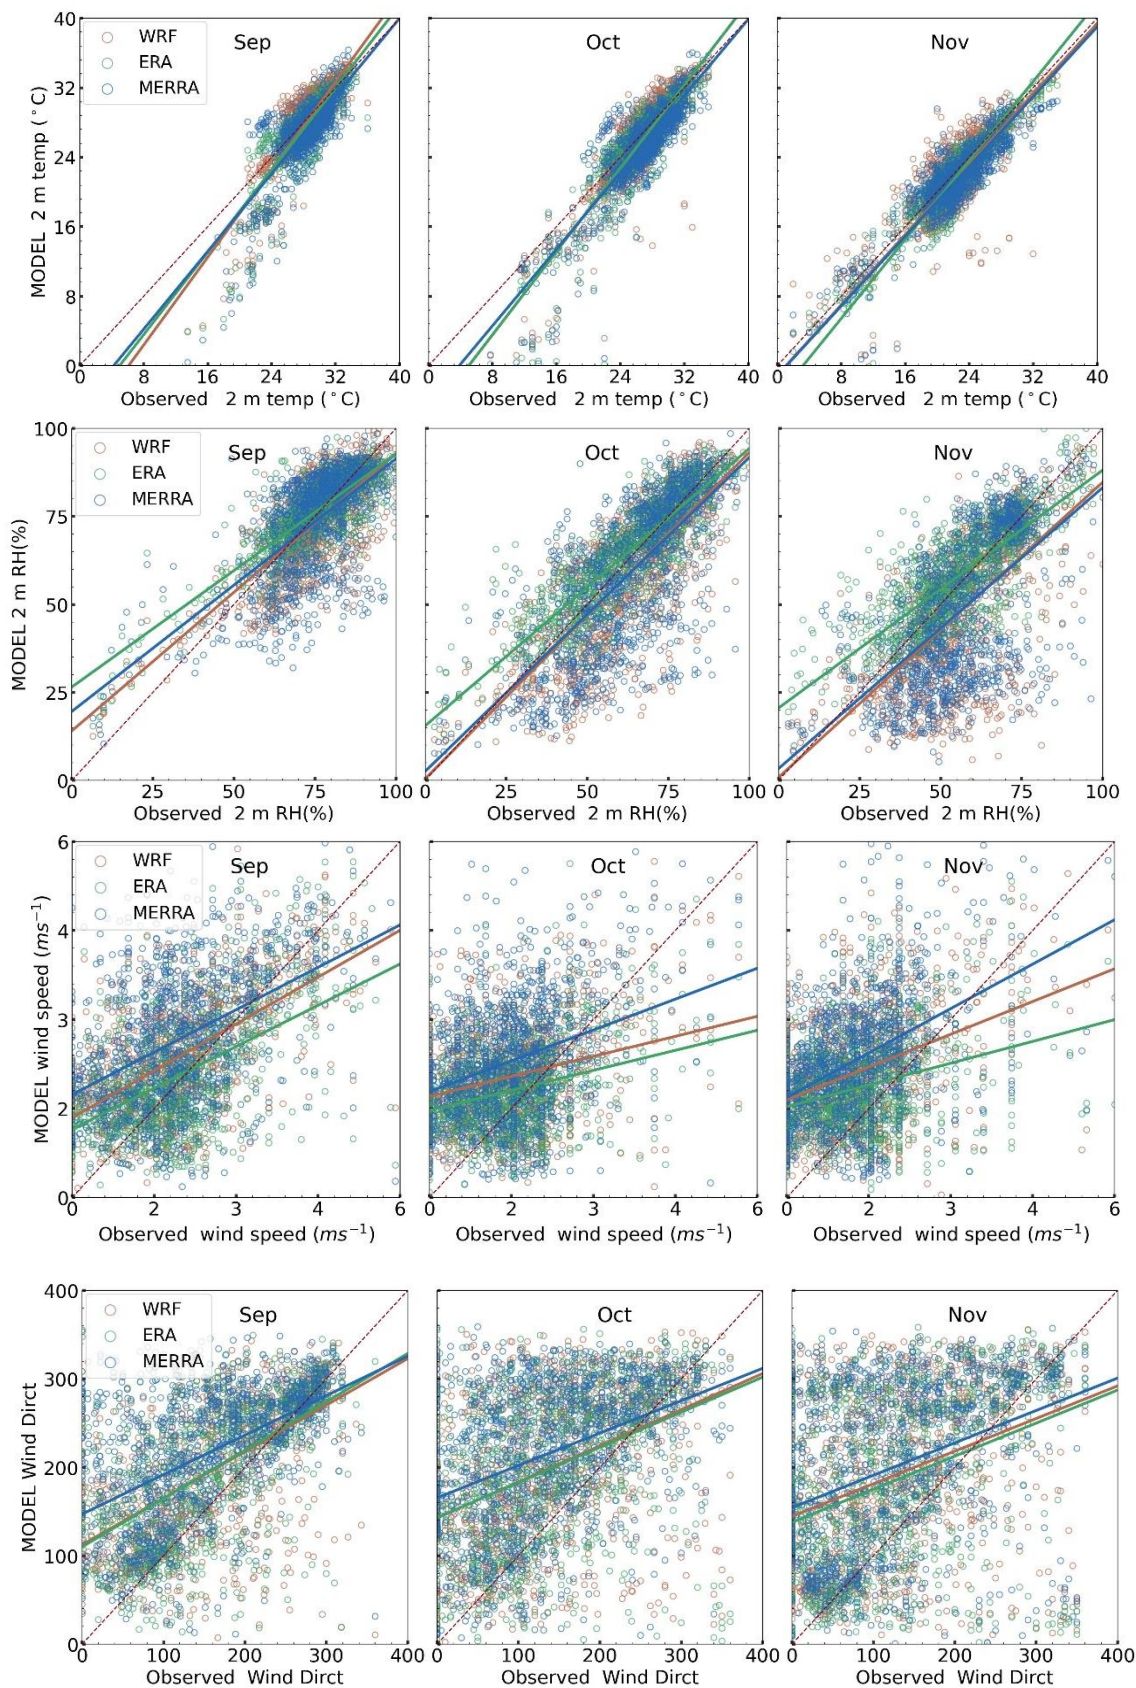

**Figure S3.** Scatter plots of daily mean measured and modelled surface meteorology variables derived from ERA-5, MERRA-2 and WRF-Chem across the 49 ASOS measurement sites for each of the 3 months of the study period: 2 m temperature, relative humidity (%), and wind speed ( $m s^{-1}$ ). The 1:1 line is shown as red dashed.

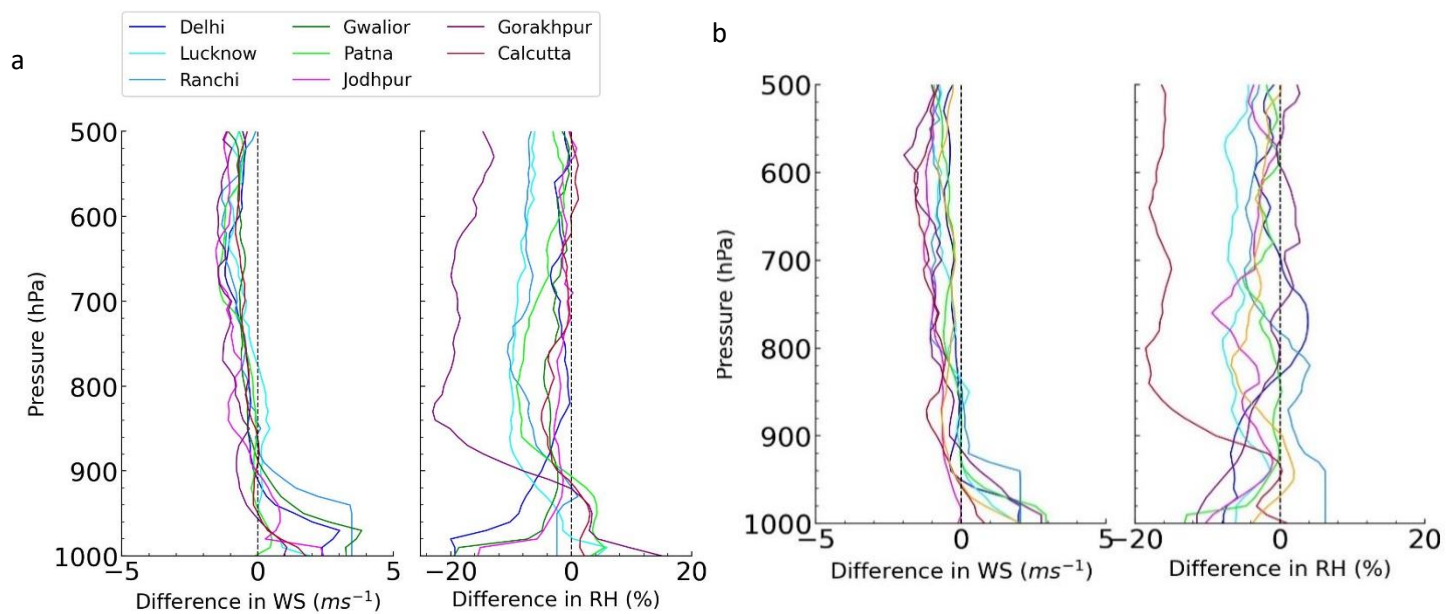

**Figure S4.** Difference between model and radiosonde vertical profiles at all RAOB sites at a) 00 UTC (5.30 IST) and b) 12 UTC (17.30 IST) for wind speed, WS (first panel) and relative humidity, RH (right panel).



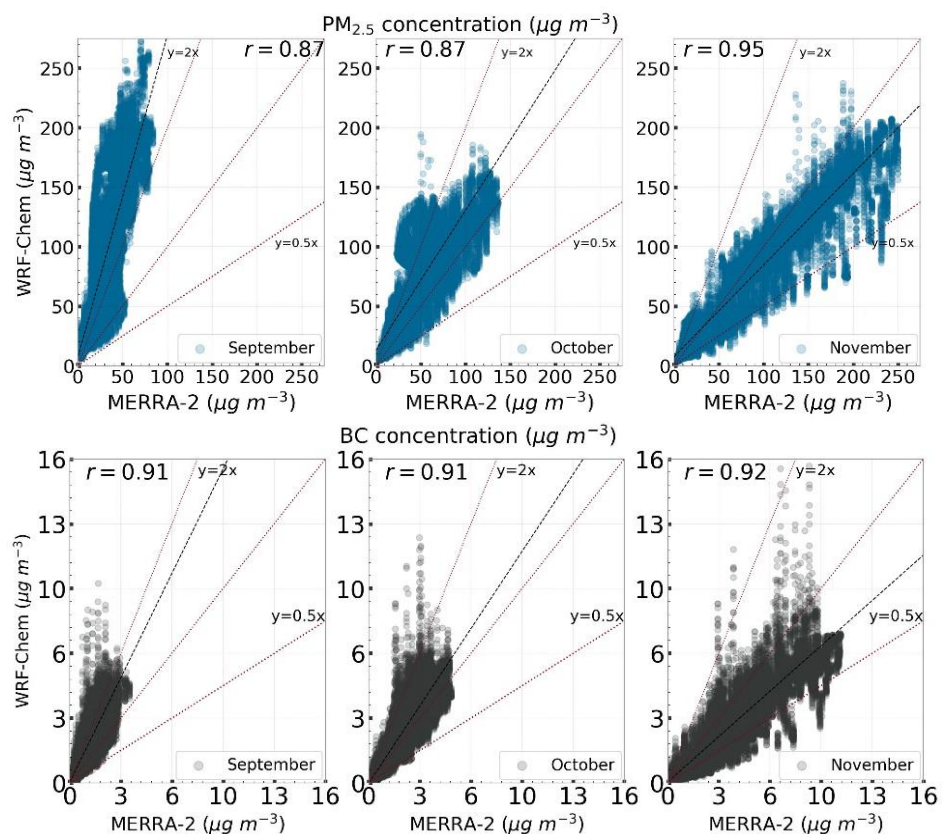

**Figure S5.** Scatter plots for comparisons of spatial distribution of monthly mean concentrations ( $\mu\text{g m}^{-3}$ ) of  $\text{PM}_{2.5}$  (top) and black carbon (bottom) from the WRF-Chem model and MERRA-2 from September to November 2016. The 2:1, 1:1 and 1:2 lines (red dashed lines), the best-fit line (black line) and Pearson's correlation coefficient  $r$  are also shown for each month.

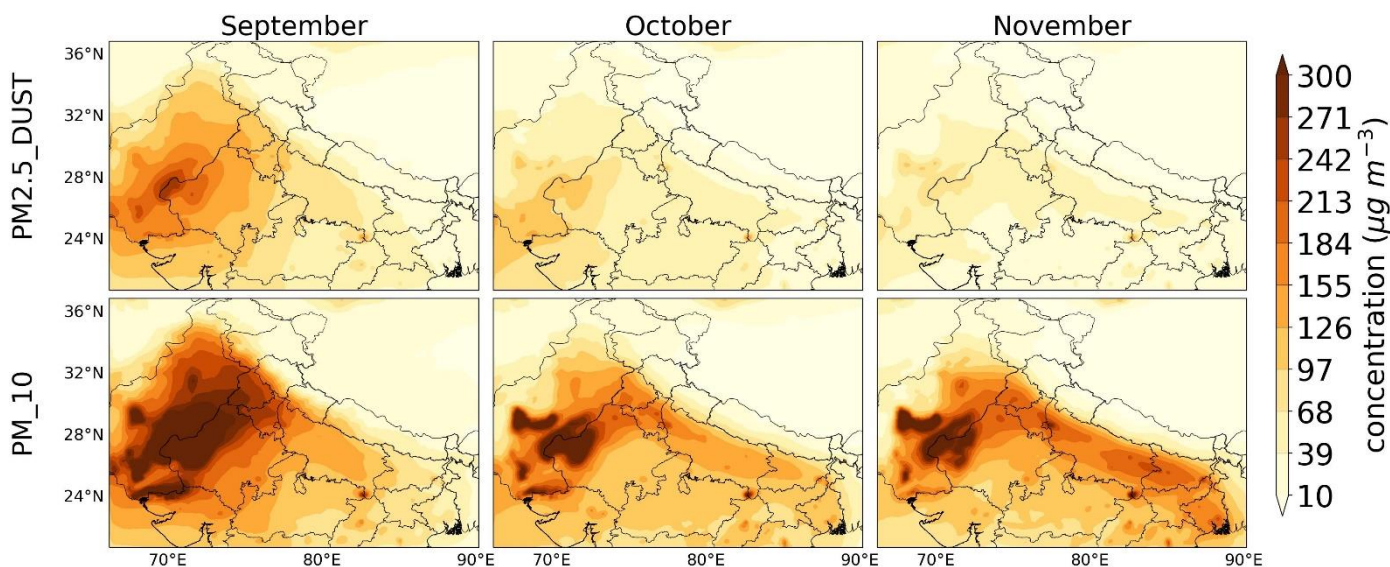

**Figure S6.** Spatial distributions of modelled monthly mean concentrations of the dust component of  $\text{PM}_{2.5}$  (top row) and of  $\text{PM}_{10}$  (bottom row) for September to November 2016.
